# Supplementary material for: Longitudinal Serum Chloride Trajectories and Their Correlation with All-Cause Mortality in Critically Ill Sepsis Patients: A Retrospective Cohort Analysis
Source: Research Square preprint supplement (doi:10.21203/rs.3.rs-5925589/v1), 2025-04-21
Supplement: Supplementary file 1 [file 144db16b934524ee1a0df6cb.docx]

**Supplementary documents**

**Table S1.** Presentation of model comparison results for potential category 1 to 5 groups.

**Table S2.** MIMIC-IV average posterior probabilities

**Figure S1.** heat map of correlations between different variables.

| **Table S1.** Presentation of model comparison results for potential category 1 to 5 groups | | | | | | |
| --- | --- | --- | --- | --- | --- | --- |
|  | BIC | %class1 | %class2 | %class3 | %class4 | %class5 |
| Model 1 | 182873.50 | 100 |  |  |  |  |
| Model 2 | 177798.27 | 64.21 | 35.79 |  |  |  |
| Model 3 | 175872.33 | 27.26 | 11.98 | 60.77 |  |  |
| Model 4 | 175134.90 | 8.91 | 52.87 | 33.17 | 5.05 |  |
| Model 5 | 174919.26 | 2.80 | 27.75 | 48.83 | 17.41 | 3.20 |

| **Table S2.** MIMIC-IV average posterior probabilities | | | | |
| --- | --- | --- | --- | --- |
|  | **prob1** | **prob2** | **prob3** | **prob4** |
| Class1 | **0.84** | 0.16 | 0 | 0 |
| Class2 | 0.05 | **0.85** | 0.10 | 0 |
| Class3 | 0 | 0.13 | **0.85** | 0.02 |
| Class4 | 0 | 0 | 0.11 | **0.89** |


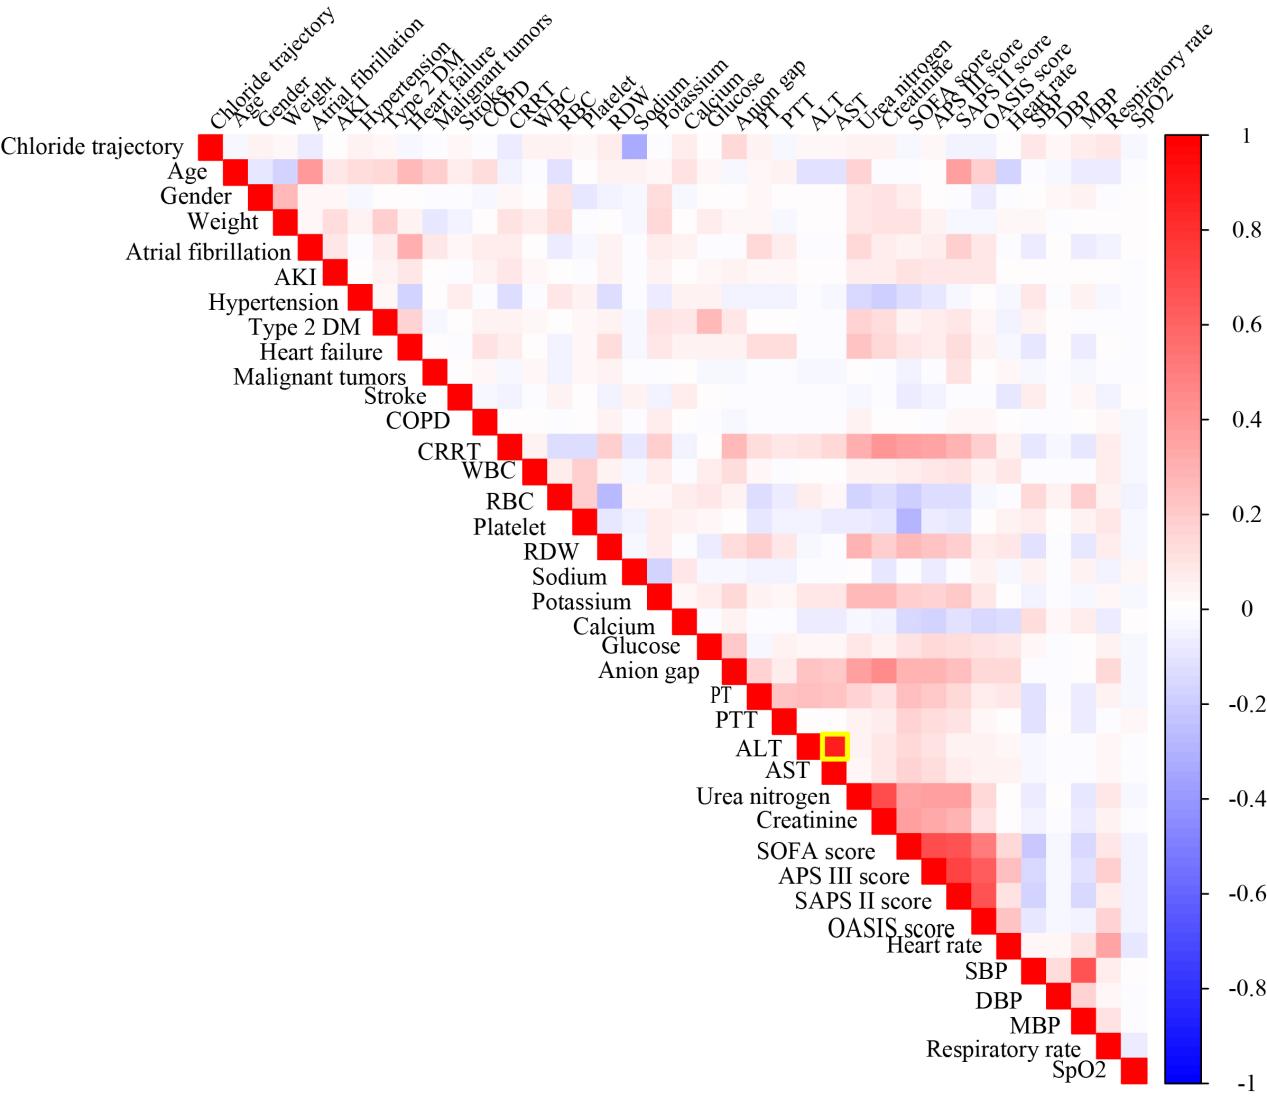


**Figure S1.** heat map of correlations between different variables.
