# Supplementary material for: Longitudinal Serum Chloride Trajectories and Their Correlation with All-Cause Mortality in Critically Ill Sepsis Patients: A Retrospective Cohort Analysis
Source: Research Square preprint supplement (doi:10.21203/rs.3.rs-5925589/v1), 2025-04-21
Supplement: Supplementary file 2 [file 9e9c615e381562369612309f.docx]

| **Table 1.** Baseline characteristics of patients stratified by serum chloride trajectory groups | | | | | | |
| --- | --- | --- | --- | --- | --- | --- |
|  | **Total (n = 6219)** | **Class 1 (n = 554)** | **Class 2 (n = 3288)** | **Class 3 (n = 2063)** | **Class 4 (n = 314)** | ***P*** |
|
| Chloride, mmol/L | 105.00 (100.00, 109.00) | 111.00 (107.00,114.00) | 106.00 (102.00,109.00) | 102.00 (98.00,106.00) | 99.00 (92.25,103.75) | <.001 |
| Age, years | 67.00 (55.00, 77.00) | 69.00 (57.00,79.00) | 67.00 (55.00,78.00) | 66.00 (55.00,77.00) | 63.00 (51.00,74.00) | <.001 |
| Gender (male), n (%) | 3574 (57.47) | 291 (52.53) | 1858 (56.51) | 1226 (59.43) | 199 (63.38) | 0.002 |
| Weight, kg | 80.80 (68.00, 97.70) | 78.90 (65.62,95.00) | 81.00 (67.90,97.60) | 81.50 (68.40,98.50) | 80.00 (68.54,96.99) | 0.093 |
| WBC, K/µL | 12.20 (8.60, 16.80) | 12.56 (8.83,16.90) | 11.90 (8.40,16.40) | 12.60 (8.85,17.30) | 12.61 (8.62,17.15) | 0.001 |
| RBC, m/µL | 3.56 (3.02, 4.14) | 3.31 (2.84,3.96) | 3.58 (3.04,4.15) | 3.58 (3.05,4.13) | 3.71 (3.02,4.21) | <.001 |
| Platelet, K/µL | 187.00 (129.00, 256.00) | 168.00 (121.00,226.00) | 189.00 (132.00,257.00) | 190.00 (130.00,263.00) | 177.50 (115.25,258.75) | <.001 |
| RDW, % | 14.60 (13.60, 16.20) | 14.40 (13.50,15.80) | 14.50 (13.60,16.00) | 14.70 (13.60,16.50) | 14.50 (13.60,16.28) | 0.001 |
| Sodium, mmol/L | 139.00 (136.00, 142.00) | 142.00 (139.00,145.00) | 139.00 (137.00,142.00) | 138.00 (134.00,141.00) | 136.00 (131.00,139.00) | <.001 |
| Potassium, mmol/L | 4.10 (3.70, 4.60) | 4.15 (3.70,4.60) | 4.10 (3.70,4.60) | 4.10 (3.70,4.60) | 3.90 (3.50,4.57) | 0.003 |
| Calcium, mg/dL | 8.20 (7.70, 8.70) | 8.10 (7.60,8.60) | 8.20 (7.70,8.70) | 8.30 (7.70,8.80) | 8.40 (7.80,8.90) | <.001 |
| Glucose, mg/dL | 135.00 (110.00, 176.00) | 132.00 (111.00,169.00) | 134.00 (109.00,172.00) | 138.00 (111.00,184.00) | 143.00 (115.00,185.25) | 0.002 |
| Anion gap, mmol/L | 15.00 (12.00, 18.00) | 14.00 (11.00,17.00) | 14.00 (12.00,17.00) | 15.00 (13.00,18.00) | 16.00 (14.00,19.00) | <.001 |
| PT, sec | 14.40 (12.70, 17.50) | 15.00 (13.20,17.67) | 14.20 (12.60,16.90) | 14.40 (12.70,18.20) | 14.50 (12.30,18.35) | <.001 |
| PTT, sec | 31.50 (27.40, 39.90) | 32.55 (27.72,42.07) | 31.30 (27.30,39.30) | 31.60 (27.40,39.95) | 31.10 (27.20,41.00) | 0.104 |
| ALT, u/dL | 36.00 (19.00, 72.51) | 35.00 (19.00,74.14) | 36.64 (19.00,73.00) | 37.00 (20.00,72.53) | 35.00 (20.00,70.00) | 0.731 |
| AST, u/dL | 53.00 (29.00, 112.00) | 60.33 (35.00,124.75) | 52.00 (29.00,110.32) | 52.00 (29.00,110.73) | 53.59 (28.25,114.50) | 0.034 |
| Urea nitrogen, mg/dL | 21.00 (14.00, 36.00) | 22.00 (14.00,37.00) | 20.00 (14.00,33.00) | 23.00 (15.00,40.00) | 20.00 (14.00,41.75) | <.001 |
| Creatinine, mg/dL | 1.10 (0.80, 1.70) | 1.00 (0.80,1.67) | 1.00 (0.70,1.60) | 1.10 (0.80,1.80) | 1.10 (0.80,1.80) | <.001 |
| SOFA score | 6.00 (4.00, 9.00) | 7.00 (5.00,10.00) | 6.00 (4.00,9.00) | 6.00 (4.00,10.00) | 6.00 (3.00,9.00) | <.001 |
| APS III score | 52.00 (39.00, 69.00) | 52.00 (40.00,69.00) | 51.00 (38.00,67.00) | 54.00 (40.00,71.00) | 53.00 (38.00,68.75) | <.001 |
| SAPS II score | 41.00 (33.00, 51.00) | 44.00 (36.00,55.00) | 41.00 (32.00,51.00) | 42.00 (33.00,51.00) | 40.00 (32.00,50.00) | <.001 |
| OASIS score | 36.00 (31.00, 42.00) | 37.00 (32.00,43.00) | 36.00 (31.00,42.00) | 36.00 (30.00,42.00) | 35.00 (29.00,40.00) | <.001 |
| Heart rate, minute | 90.00 (77.00, 106.00) | 88.00 (78.00,102.00) | 90.00 (78.00,106.00) | 91.00 (77.00,107.00) | 88.00 (74.25,103.00) | 0.059 |
| SBP, mmHg | 120.00 (102.00, 138.00) | 114.00 (98.00,132.75) | 119.00 (102.00,137.00) | 121.00 (104.00,139.00) | 129.00 (111.25,145.00) | <.001 |
| DBP, mmHg | 66.00 (55.00, 79.00) | 62.00 (51.00,75.00) | 66.00 (55.00,78.00) | 67.00 (56.00,80.00) | 70.00 (59.25,82.00) | <.001 |
| MBP, mmHg | 79.00 (68.00, 92.00) | 75.00 (63.00,87.00) | 79.00 (68.00,92.00) | 80.00 (68.00,93.00) | 84.50 (72.00,97.00) | <.001 |
| Respiratory rate, minute | 19.00 (16.00, 24.00) | 18.00 (15.00,22.00) | 19.00 (15.00,24.00) | 20.00 (16.00,25.00) | 20.00 (16.00,24.00) | <.001 |
| SpO2, % | 98.00 (95.00, 100.00) | 99.00 (96.00,100.00) | 98.00 (95.00,100.00) | 98.00 (94.00,100.00) | 98.00 (95.00,100.00) | <.001 |
| PH | 7.37 (7.29, 7.43) | 7.35 (7.28,7.42) | 7.37 (7.29,7.42) | 7.38 (7.30,7.43) | 7.41 (7.34,7.46) | <.001 |
| Liquid balance, ml | 2380.09 (541.10, 5011.28) | 3512.43 (1370.82,6008.20) | 2558.27 (655.19,5262.69) | 2008.87 (290.11,4489.95) | 1492.95 (76.80,3323.40) | <.001 |
| Atrial fibrillation (yes), n (%) | 2192 (35.25) | 247 (44.58) | 1170 (35.58) | 693 (33.59) | 82 (26.11) | <.001 |
| AKI (yes), n (%) | 5961 (95.85) | 533 (96.21) | 3145 (95.65) | 1978 (95.88) | 305 (97.13) | 0.612 |
| Hypertension (yes), n (%) | 2605 (41.89) | 203 (36.64) | 1355 (41.21) | 890 (43.14) | 157 (50.00) | <.001 |
| Type 2 DM (yes), n (%) | 1704 (27.40) | 141 (25.45) | 876 (26.64) | 593 (28.74) | 94 (29.94) | 0.180 |
| Heart failure (yes), n (%) | 1911 (30.73) | 177 (31.95) | 1049 (31.90) | 617 (29.91) | 68 (21.66) | 0.002 |
| Malignant tumors (yes), n (%) | 854 (13.73) | 73 (13.18) | 464 (14.11) | 272 (13.18) | 45 (14.33) | 0.762 |
| Stroke (yes), n (%) | 662 (10.64) | 61 (11.01) | 330 (10.04) | 215 (10.42) | 56 (17.83) | <.001 |
| COPD (yes), n (%) | 581 (9.34) | 55 (9.93) | 316 (9.61) | 187 (9.06) | 23 (7.32) | 0.532 |
| CRRT (yes), n (%) | 837 (13.46) | 117 (21.12) | 439 (13.35) | 248 (12.02) | 33 (10.51) | <.001 |
| 28-day mortality (yes), n (%) | 1406 (22.61) | 113 (20.40) | 636 (19.34) | 542 (26.27) | 115 (36.62) | <0.001 |
| 365-day mortality (yes), n (%) | 2431 (39.09) | 202 (36.46) | 1163 (35.37) | 897 (43.48) | 169 (53.82) | <.001 |
| WBC, white blood cell; RBC, red blood cell; RDW, red blood cell distribution width; PT, prothrombin time; PTT, partial thromboplastin time; ALT, alanine aminotransferase; AST, aspartate transaminase; SOFA, sequential organ failure assessment; APS III, acute physiology score III; SAPS II, simplified acute physiology score II; OASIS, oxford acute severity of illness score; SBP, systolic blood pressure; DBP, diastolic blood pressure; MBP, mean blood pressure; SpO2, percutaneous arterial oxygen saturation; AKI, acute kidney injury; DM, diabetes mellitus; COPD, chronic obstructive pulmonary disease; CRRT, continuous renal replacement therapy. | | | | | | |
| Continuous variables are expressed as median (IQR), and categorical variables are expressed as n (%). | | | | | | |

| **Table 2.** Relationship between serum chloride trajectories and mortality in patients with sepsis in different models | | | | | | |
| --- | --- | --- | --- | --- | --- | --- |
|  | **Model 1** | | **Model 2** | | **Model 3** | |
|  | HR (95%CI) | *P* | HR (95%CI) | *P* | HR (95%CI) | *P* |
| 28-day mortality | | | | | | |
| Serum chloride trajectory |  |  |  |  |  |  |
| Class 1 | 1.00 |  | 1.00 |  | 1.00 |  |
| Class 2 | 0.94(0.77, 1.14) | 0.526 | 0.98(0.80, 1.20) | 0.842 | 0.92(0.75, 1.13) | 0.429 |
| Class 3 | 1.33(1.09, 1.63) | 0.006 | 1.41(1.15, 1.73) | <.001 | 1.21(0.97, 1.51) | 0.089 |
| Class 4 | 1.98(1.53, 2.56) | <.001 | 2.32(1.79, 3.01) | <.001 | 2.04(1.53, 2.71) | <.001 |
| P for trend | <.001 |  | <.001 |  | <.001 |  |
| 365-day mortality | | | | | | |
| Serum chloride trajectory |  |  |  |  |  |  |
| Class 1 | 1.00 |  | 1.00 |  | 1.00 |  |
| Class 2 | 0.96(0.82, 1.11) | 0.57 | 1.01(0.87, 1.17) | 0.894 | 0.96(0.82, 1.12) | 0.584 |
| Class 3 | 1.27(1.09, 1.48) | 0.002 | 1.37(1.17, 1.59) | <.001 | 1.18(1.01, 1.40) | 0.048 |
| Class 4 | 1.76(1.43, 2.16) | <.001 | 2.12(1.73, 2.61) | <.001 | 1.90(1.52, 2.37) | <.001 |
| P for trend | <.001 |  | <.001 |  | <.001 |  |
| Model 1: Crude. | | | | | | |
| Model 2: Adjust: age, gender, hypertension, and heart failure | | | | | | |
| Model 3: Adjust: age, gender, WBC, RBC, platelet, RDW, sodium, calcium, glucose, anion gap, PT, ALT, AST, PH, urea nitrogen, creatinine, SOFA score, APS III score, OASIS score, SBP, MBP, respiratory rate, SpO2, atrial fibrillation, hypertension, heart failure, stroke, CRRT, diuretic use, and liquid balance. | | | | | | |

| **Table 3.** Relationship between serum chloride trajectory and mortality in patients with sepsis in different models after excluding patients with malignancy | | | | | | |
| --- | --- | --- | --- | --- | --- | --- |
|  | **Model 1** | | **Model 2** | | **Model 3** | |
|  | HR (95%CI) | *P* | HR (95%CI) | *P* | HR (95%CI) | *P* |
| 28-day mortality |  |  |  |  |  |  |
| Serum chloride trajectory |  |  |  |  |  |  |
| Class 1 | 1.00 |  | 1.00 |  | 1.00 |  |
| Class 2 | 0.84(0.68, 1.05) | 0.120 | 0.97(0.83, 1.15) | 0.763 | 0.88(0.70, 1.10) | 0.245 |
| Class 3 | 1.18(0.95, 1.47) | 0.134 | 1.32(1.12, 1.56) | 0.001 | 1.13(0.89, 1.44) | 0.314 |
| Class 4 | 1.78(1.34, 2.36) | <.001 | 2.12(1.69, 2.66) | <.001 | 1.97(1.44, 2.70) | <.001 |
| 365-day mortality |  |  |  |  |  |  |
| Serum chloride trajectory |  |  |  |  |  |  |
| Class 1 | 1.00 |  | 1.00 |  | 1.00 |  |
| Class 2 | 0.92(0.78, 1.09) | 0.322 | 0.97(0.83, 1.15) | 0.763 | 0.96(0.81, 1.14) | 0.648 |
| Class 3 | 1.22(1.03, 1.45) | 0.019 | 1.32(1.12, 1.56) | 0.001 | 1.18(0.98, 1.42) | 0.082 |
| Class 4 | 1.72(1.37, 2.15) | <.001 | 2.12(1.69, 2.66) | <.001 | 1.93(1.50, 2.48) | <.001 |
| Model 1: Crude. | | | | | | |
| Model 2: Adjust: age, gender, hypertension, and heart failure. | | | | | | |
| Model 3: Adjust: age, gender, WBC, RBC, platelet, RDW, sodium, calcium, glucose, anion gap, PT, ALT, AST, PH, urea nitrogen, creatinine, SOFA score, APS III score, OASIS score, SBP, MBP, respiratory rate, SpO2, atrial fibrillation, hypertension, heart failure, stroke, CRRT, diuretic use, and liquid balance. | | | | | | |

| **Table 4.** Relationship between serum chloride trajectories and 28-day mortality in patients with sepsis in different subgroups | | | | | |
| --- | --- | --- | --- | --- | --- |
|  | **Class 1** | **Class 2** | **Class 3** | **Class 4** | **P for interaction** |
| Age |  |  |  |  | 0.004 |
| ≥65 | 1.00 | 0.99(0.78,1.27) | 1.24(0.95,1.61) | 1.65(1.14,2.39) |  |
| <65 | 1.00 | 0.81(0.55,1.18) | 1.12(0.75,1.65) | 2.11(1.31,3.38) |  |
| Gender |  |  |  |  | 0.313 |
| female | 1.00 | 0.97(0.72,1.30) | 1.22(0.89,1.67) | 2.17(1.42,3.33) |  |
| male | 1.00 | 0.87(0.65,1.16) | 1.15(0.85,1.56) | 1.68(1.14,2.47) |  |
| Hypertension |  |  |  |  | 0.311 |
| no | 1.00 | 0.87(0.67,1.12) | 1.16(0.89,1.52) | 1.88(1.30,2.73) |  |
| yes | 1.00 | 1.04(0.72,1.49) | 1.3(0.89,1.91) | 1.97(1.25,3.13) |  |
| AKI |  |  |  |  | 0.010 |
| no | 1.00 | 0.94(0.76,1.16) | 1.2(0.96,1.50) | 1.89(1.42,2.53) |  |
| yes | 1.00 | 0.3(0.08,1.13) | 1.33(0.35,5.07) | 1.35(0.18，10.18) |  |
| Type 2 DM |  |  |  |  | 0.041 |
| no | 1.00 | 0.96(0.75,1.22) | 1.29(1.00,1.67) | 1.89(1.34,2.65) |  |
| yes | 1.00 | 0.82(0.55,1.21) | 0.97(0.64,1.46) | 1.92(1.15,3.23) |  |

| **Table 5.** Relationship between serum chloride trajectories and 365-day mortality in patients with sepsis in different subgroups | | | | | |
| --- | --- | --- | --- | --- | --- |
|  | **Class 1** | **Class 2** | **Class 3** | **Class 4** | **P for interaction** |
| Age |  |  |  |  | 0.001 |
| ≥65 | 1.00 | 1.06(0.88,1.28) | 1.26(1.03,1.54) | 1.59(1.18,2.13) |  |
| <65 | 1.00 | 0.82(0.62,1.08) | 1.05(0.78,1.40) | 1.84(1.28,2.64) |  |
| Gender |  |  |  |  | 0.017 |
| female | 1.00 | 0.98(0.79,1.21) | 1.11(0.88,1.41) | 1.98(1.42,2.77) |  |
| male | 1.00 | 0.96(0.77,1.20) | 1.24(0.99,1.56) | 1.66(1.22,2.24) |  |
| Hypertension |  |  |  |  | 0.249 |
| no | 1.00 | 0.98(0.81,1.18) | 1.18(0.96,1.44) | 1.83(1.36,2.45) |  |
| yes | 1.00 | 0.96(0.74,1.26) | 1.21(0.91,1.60) | 1.74(1.22,2.47) |  |
| AKI |  |  |  |  | 0.172 |
| no | 1.00 | 0.97(0.83,1.14) | 1.18(1.00,1.39) | 1.78(1.42,2.23) |  |
| yes | 1.00 | 0.66(0.26,1.69) | 1.28(0.48,3.41) | 2.24(0.47,10.69) |  |
| Type 2 DM |  |  |  |  | 0.137 |
| no | 1.00 | 0.94(0.78,1.12) | 1.17(0.96,1.42) | 1.73(1.32,2.25) |  |
| yes | 1.00 | 1.03(0.77,1.38) | 1.2(0.88,1.64) | 1.93(1.28,2.91) |  |
